# Supplementary material for: Study on superconducting Li–Se–H hydrides
Source: Royal Society of Chemistry journal article supplement (doi:10.1039/d1cp04963a), 2022-01-01
Supplement: d1cp04963a1.pdf [file d1cp04963a1.pdf]

## Supporting Information

### **Study on superconducting Li-Se-H hydrides**

BingYu Li<sup>†</sup>, WenHua Yang<sup>\*†</sup>, HaiLiang Chen<sup>†</sup>, Lizhen Zhao<sup>†</sup>, LingYan Chen<sup>†</sup>,  
KaiPing Yang<sup>†</sup>, WenCai Lu<sup>\*,†,‡</sup>

<sup>†</sup>College of Physics, Qingdao University, Qingdao, Shandong 266071, P. R. China

<sup>‡</sup>Institute of Theoretical Chemistry, Jilin University, Changchun, Jilin 130021, P. R.  
China

\*Corresponding author. Email: [wencailu@jlu.edu.cn](mailto:wencailu@jlu.edu.cn); [yangwh@qdu.edu.cn](mailto:yangwh@qdu.edu.cn)

**Table S1** Lattice parameters and atomic fractional coordinates of the LiSeH<sub>n</sub> (n=4-10) structures.

| Phase                        | Pressure (GPa) | Parameters (Å, degree) | Atom | Atomic coordinates |         |          |
|------------------------------|----------------|------------------------|------|--------------------|---------|----------|
| LiSeH <sub>4</sub><br>(C2)   | 150            | a=4.38190              |      |                    |         |          |
|                              |                | b=4.43370              | H    | -0.36380           | 0.56607 | -0.56608 |
|                              |                | c=2.75520              | H    | -0.60630           | 0.34724 | -0.07222 |
|                              |                | α=90.0000              | Li   | 0.50000            | 0.20110 | -0.50000 |
|                              |                | β=118.6402             | Se   | -0.50000           | 0.84927 | 0.00000  |
|                              |                | γ=90.0000              |      |                    |         |          |
| LiSeH <sub>4</sub><br>(C2)   | 200            | a=4.11540              |      |                    |         |          |
|                              |                | b=4.20620              | H    | -0.36556           | 0.5609  | -0.55481 |
|                              |                | c=2.59400              | H    | -0.61197           | 0.35051 | -0.07383 |
|                              |                | α=90.0000              | Li   | 0.50000            | 0.20333 | -0.50000 |
|                              |                | β=117.5084             | Se   | -0.50000           | 0.85085 | 0.00000  |
|                              |                | γ=90.0000              |      |                    |         |          |
| LiSeH <sub>4</sub><br>(C2)   | 250            | a=4.11540              |      |                    |         |          |
|                              |                | b=4.20620              | H    | -0.36538           | 0.55793 | -0.55015 |
|                              |                | c=2.59400              | H    | -0.61513           | 0.35243 | -0.07639 |
|                              |                | α=90.0000              | Li   | 0.50000            | 0.20487 | -0.50000 |
|                              |                | β=117.5084             | Se   | -0.50000           | 0.85143 | 0.00000  |
|                              |                | γ=90.0000              |      |                    |         |          |
| LiSeH <sub>4</sub><br>(R-3m) | 250            | a=2.50830              |      |                    |         |          |
|                              |                | b=2.50830              | H    | 0.33333            | 0.66667 | -0.06237 |
|                              |                | c=10.81850             | H    | 0.33333            | 0.66667 | 0.01118  |
|                              |                | α=90.0000              | Li   | 2.00000            | 1.00000 | 0.00000  |
|                              |                | β=90.0000              | Se   | 0.33333            | 0.66667 | 0.16667  |
|                              |                | γ=120.0000             |      |                    |         |          |
| LiSeH <sub>6</sub><br>(Pmm2) | 200            | a=2.85780              | H    | 1.50000            | 1.15502 | 0.30232  |
|                              |                | b=2.63570              | H    | 0.85232            | 0.50000 | 0.24197  |
|                              |                | c=3.23420              | H    | 1.00000            | 0.84705 | 0.53553  |
|                              |                | α=90.0000              | Li   | 0.00000            | 0.00000 | 0.02883  |
|                              |                | β=90.0000              | Se   | 0.50000            | 0.50000 | 0.77305  |
|                              |                | γ=90.0000              |      |                    |         |          |
| LiSeH <sub>6</sub><br>(Pmm2) | 250            | a=2.77130              | H    | 1.50000            | 1.15739 | 0.30163  |
|                              |                | b=2.57470              | H    | 0.84467            | 0.50000 | 0.24100  |
|                              |                | c=3.16300              | H    | 1.00000            | 0.84311 | 0.53497  |
|                              |                | α=90.0000              | Li   | 0.00000            | 0.00000 | 0.03351  |
|                              |                | β=90.0000              | Se   | 0.50000            | 0.50000 | 0.77283  |
|                              |                | γ=90.0000              |      |                    |         |          |

|                                       |     |            |          |          |          |          |
|---------------------------------------|-----|------------|----------|----------|----------|----------|
| LiSeH <sub>6</sub><br>( <i>Pmm2</i> ) | 300 | a=2.70900  | H        | 1.50000  | 1.15989  | 0.30051  |
|                                       |     | b=2.51840  | H        | 0.83977  | 0.50000  | 0.24026  |
|                                       |     | c=3.10420  | H        | 1.00000  | 0.83969  | 0.53493  |
|                                       |     | α=90.0000  | Li       | 0.00000  | 0.00000  | 0.03791  |
|                                       |     | β=90.0000  | Se       | 0.50000  | 0.50000  | 0.77221  |
|                                       |     | γ=90.0000  |          |          |          |          |
| LiSeH <sub>7</sub><br>( <i>Pm</i> )   | 250 | a=2.98470  | H        | -0.49950 | -0.13330 | 0.03784  |
|                                       |     | b=2.81990  | H        | -0.04383 | 0.00000  | 0.02488  |
|                                       |     | c=2.96900  | H        | 0.07164  | 0.00000  | -0.19077 |
|                                       |     | α=90.0000  | Li       | -0.35179 | 0.00000  | -0.45852 |
|                                       |     | β=94.2308  | H        | -1.75111 | -0.50000 | -0.08612 |
|                                       |     | γ=90.0000  | H        | -1.28478 | -0.50000 | 0.02826  |
|                                       |     |            | H        | -0.29301 | -0.50000 | -0.23887 |
|                                       | Se  | -0.85419   | -0.50000 | -0.59767 |          |          |
| LiSeH <sub>8</sub><br>( <i>C2/m</i> ) | 250 | a=3.04810  | H        | 0.11349  | 0.22669  | 0.20443  |
|                                       |     | b=4.17360  | H        | -1.00000 | -0.86182 | 0.00000  |
|                                       |     | c=5.81460  | H        | -1.26049 | -1.00000 | -0.32043 |
|                                       |     | α=90.0000  | Li       | -0.50000 | 0.00000  | 0.00000  |
|                                       |     | β=136.0001 | Se       | -2.00000 | -1.00000 | -0.50000 |
|                                       |     | γ=90.0000  |          |          |          |          |
| LiSeH <sub>9</sub><br>( <i>Pmm2</i> ) | 300 | a=2.98840  | H        | -0.27450 | -0.15255 | 0.07780  |
|                                       |     | b=2.57680  | H        | -0.50000 | -1.50000 | 0.20919  |
|                                       |     | c=3.37460  | H        | 0.00000  | -0.50000 | 0.30658  |
|                                       |     | α=90.0000  | H        | 0.00000  | 0.50000  | 0.07928  |
|                                       |     | β=90.0000  | H        | -0.14347 | -1.00000 | 0.37548  |
|                                       |     | γ=90.0000  | Li       | 0.00000  | -1.00000 | 0.74472  |
|                                       |     |            | Se       | -0.50000 | -2.50000 | 0.64684  |
| LiSeH <sub>10</sub><br>( <i>C2</i> )  | 250 | a=4.96380  | H        | -0.41148 | -0.07922 | -0.09224 |
|                                       |     | b=2.93880  | H        | -0.61626 | -0.63847 | -0.76330 |
|                                       |     | c=5.45150  | H        | -0.25465 | -0.74405 | -0.54554 |
|                                       |     | α=90.0000  | H        | -0.62548 | -0.47137 | -0.65962 |
|                                       |     | β=132.8378 | H        | -0.12775 | -0.69060 | -0.35119 |
|                                       |     | γ=90.0000  | Li       | 0.00000  | -0.44730 | -0.50000 |
|                                       |     |            | Se       | -0.50000 | 0.40656  | -1.00000 |

|                     |     |           |    |          |          |          |
|---------------------|-----|-----------|----|----------|----------|----------|
|                     |     |           | H  | -0.03181 | 0.17239  | 0.98147  |
|                     |     |           | H  | 0.13776  | 0.64826  | 0.17997  |
|                     |     |           | H  | 0.46778  | 0.07917  | 0.78307  |
|                     |     | a=2.60060 | H  | -0.18090 | 0.29343  | 0.38755  |
|                     |     | b=4.28140 | H  | 0.11690  | 0.29416  | 0.38487  |
| LiSeH <sub>10</sub> | 150 | c=2.93310 | H  | 0.46797  | 0.13184  | 0.29681  |
| ( <i>Pm</i> )       |     | α=63.9930 | H  | 0.46789  | -0.12017 | -0.05197 |
|                     |     | β=90.0188 | H  | 0.79614  | -0.35350 | 1.17664  |
|                     |     | γ=90.0124 | H  | 0.46841  | -0.06699 | 0.33865  |
|                     |     |           | H  | -0.03260 | -0.02337 | 0.11201  |
|                     |     |           | Li | -0.03153 | 0.90845  | 0.64560  |
|                     |     |           | Se | 0.46789  | 0.50117  | 0.73374  |
|                     |     | a=7.4175  |    |          |          |          |
|                     |     | b=2.8296  |    |          |          |          |
| LiSe                | 200 | c=2.7757  | Li | 0.07896  | 0.5      | 0.24846  |
| ( <i>Cmcm</i> )     |     | α=90.0000 |    |          |          |          |
|                     |     | β=89.7564 | Se | 0.35722  | -0.5     | -0.74755 |
|                     |     | γ=90.0000 |    |          |          |          |

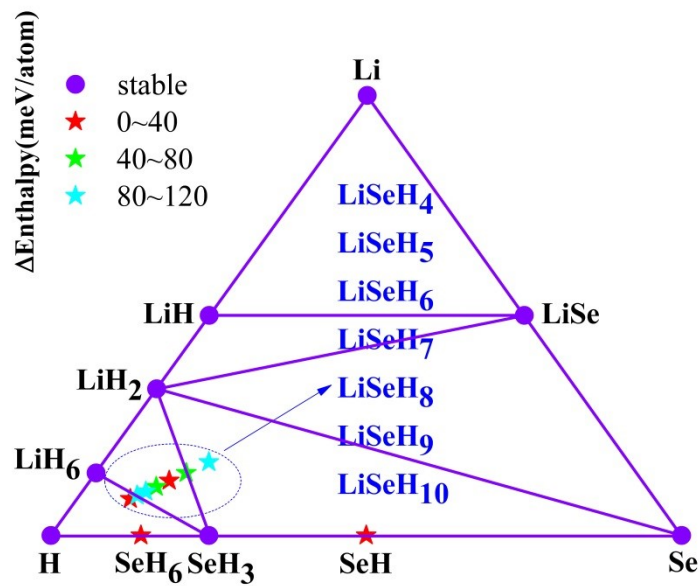

**Fig. S1** Triangular phase diagrams of the  $\text{LiSeH}_n$  ( $n=4-10$ ) systems at 200 GPa, the corresponding elements and boundary binary phases are chosen from the refs.<sup>1-6</sup> Purple circles and colored stars (red, green and blue stars represent structures with 0~40, 40~80, 80~120 meV/atom above the convex hull) indicated stable and metastable phases, respectively. At 200 GPa,  $Pmm2$   $\text{LiSeH}_6$  is 22 meV/atom above the convex hull. We performed the structural search for the  $\text{LiSe}$  at 200 GPa and the results show that the  $Cmcm$  phase is the most stable structure. The corresponding structural information is given in Table S1.

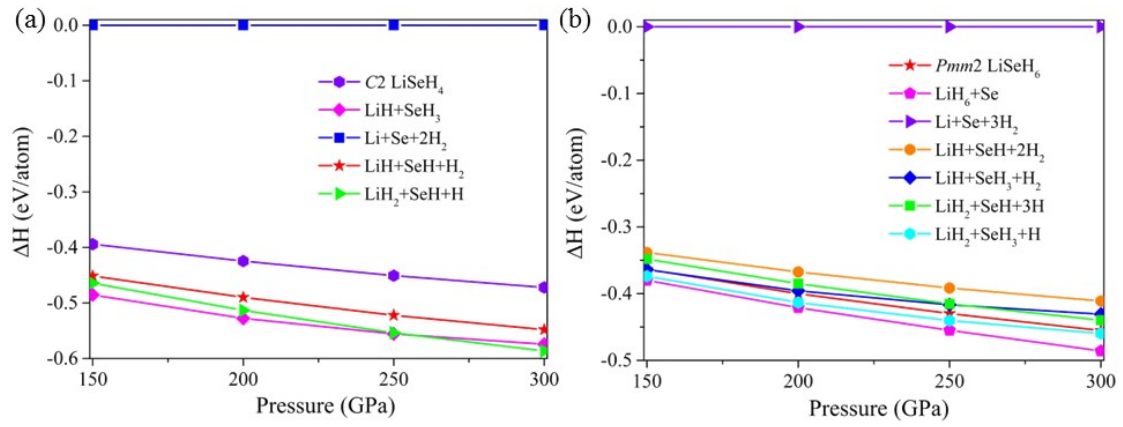

**Fig. S2** Enthalpy curves for the LiSeH<sub>4</sub> and LiSeH<sub>6</sub> as a function of pressure.

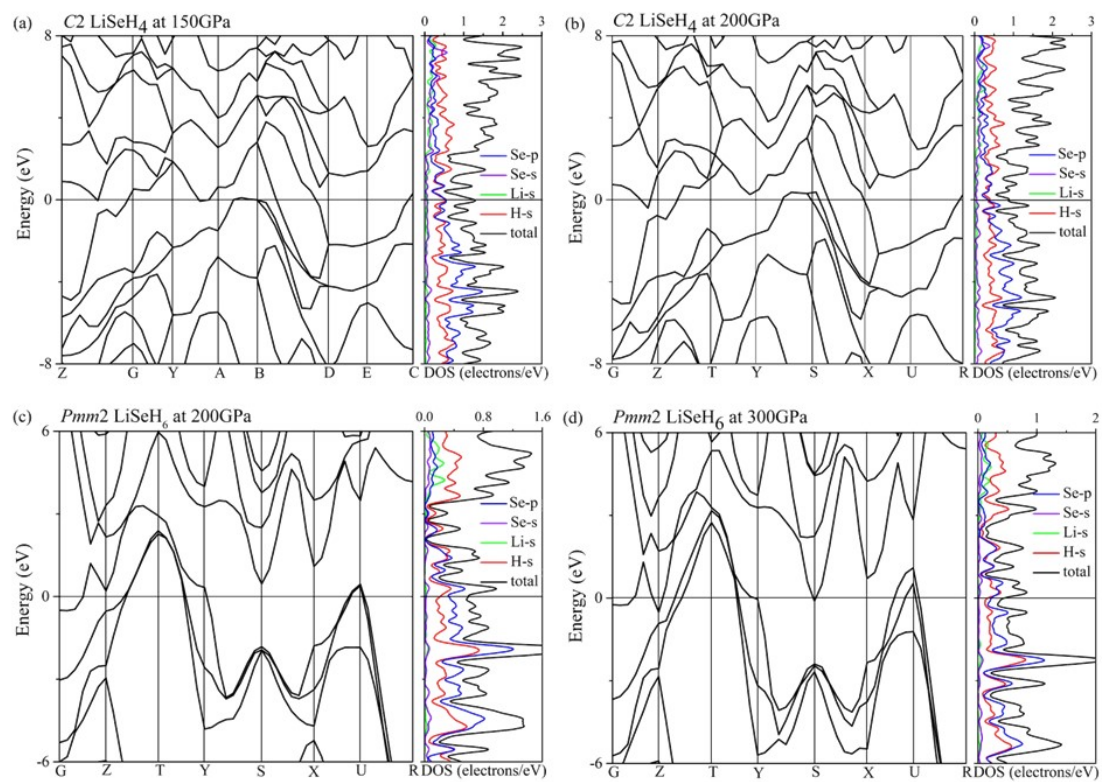

**Fig. S3** Calculated electronic band structures and density of states of the predicted crystal structures. (a) *C2* LiSeH<sub>4</sub> at 150 GPa, (b) *C2* LiSeH<sub>4</sub> at 200 GPa, (c) *Pmm2* LiSeH<sub>6</sub> at 200 GPa, and (d) *Pmm2* LiSeH<sub>6</sub> at 300 GPa.

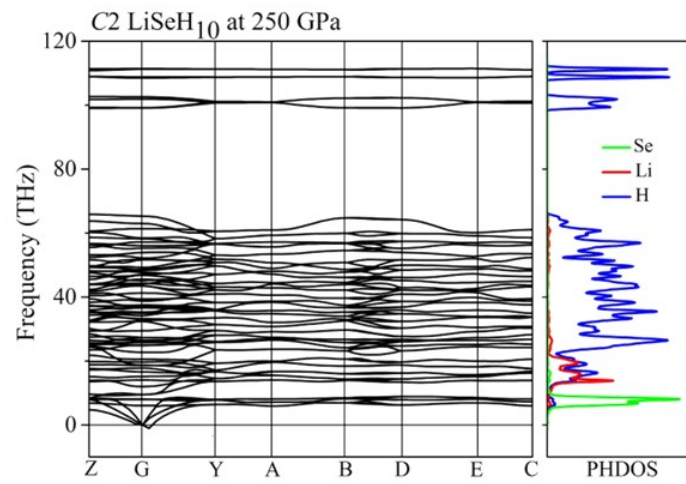

**Fig. S4** Phonon dispersion curves, phonon density of states of the predicted crystal structures C2 LiSeH<sub>10</sub> at 250 GPa.



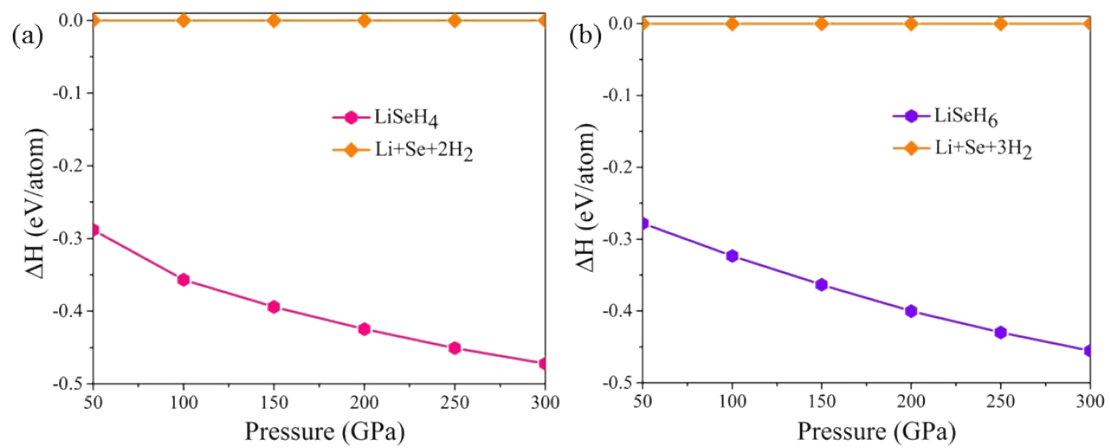

**Fig. S5** Enthalpy curves for the  $LiSeH_4$  and  $LiSeH_6$  as a function of pressure. (a)  $C2$   $LiSeH_4$ . (b)  $Pmm2$   $LiSeH_6$ .

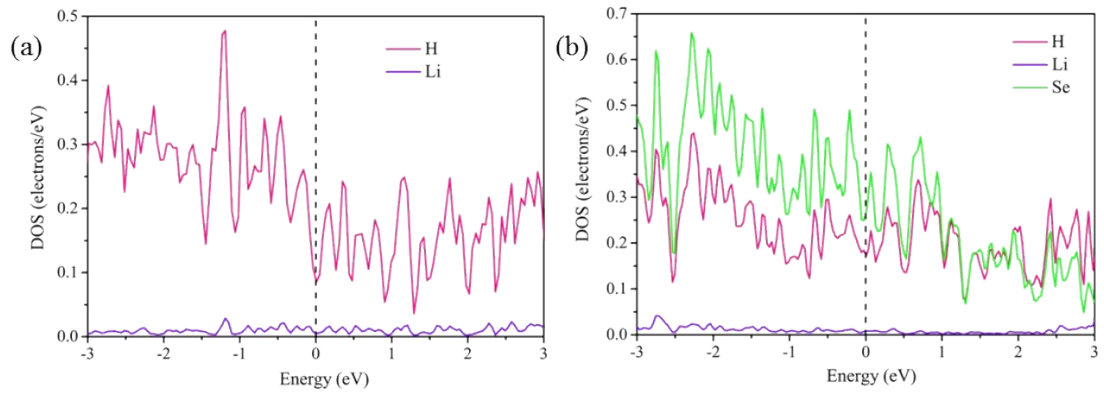

**Fig. S6** Density of states of the crystal structures. (a)  $\text{LiH}_6$  at 300 GPa, and (b)  $Pmm2$   $\text{LiSeH}_6$  at 300 GPa.

## References

1. S. Zhang, Y. Wang, J. Zhang, H. Liu, X. Zhong, H.-F. Song, G. Yang, L. Zhang and Y. Ma, *Scientific Reports*, 2015, **5**.
2. E. Zurek, R. Hoffmann, N. W. Ashcroft, A. R. Oganov and A. O. Lyakhov, *Proceedings of the National Academy of Sciences of the United States of America*, 2009, **106**, 17640-17643.
3. J. Wu, L.-Z. Zhao, H.-L. Chen, D. Wang, J.-Y. Chen, X. Guo, Q.-J. Zang and W.-C. Lu, *Physica Status Solidi B-Basic Solid State Physics*, 2018, **255**.
4. C. J. Pickard and R. J. Needs, *Nature Physics*, 2007, **3**, 473-476.
5. Y. Ma, A. R. Oganov and Y. Xie, *Physical Review B*, 2008, **78**.
6. Y. Akahama, M. Kobayashi and H. Kawamura, *Physical Review B*, 1993, **47**, 20-26.
